# Supplementary material for: Improved cycling performance of sulfur nanoparticles with a mussel inspired polydopamine coating
Source: Royal Society of Chemistry journal article supplement (doi:10.1039/c5ra22352k), 2015-12-21
Supplement: c5ra22352k1.pdf [file c5ra22352k1.pdf]

COMMUNICATION

Supporting information  
**Improved cycling performance of sulfur nanoparticles with Mussel inspired polydopamine coating**

Xianmin Liu,<sup>ab</sup> Chuanling Men,<sup>\*a</sup> Peibo Gao,<sup>b</sup> Shihao Zhuang,<sup>b</sup> Huang Tang<sup>b</sup> and Zhihao Bao<sup>\*b</sup>

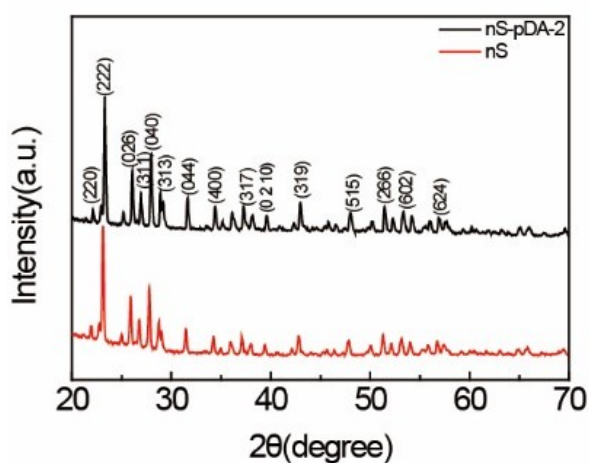

Figure S1. X-ray diffraction patterns of bare sulfur nanoparticles (nS) and ones coated with polydopamine (nS-pDA-2).

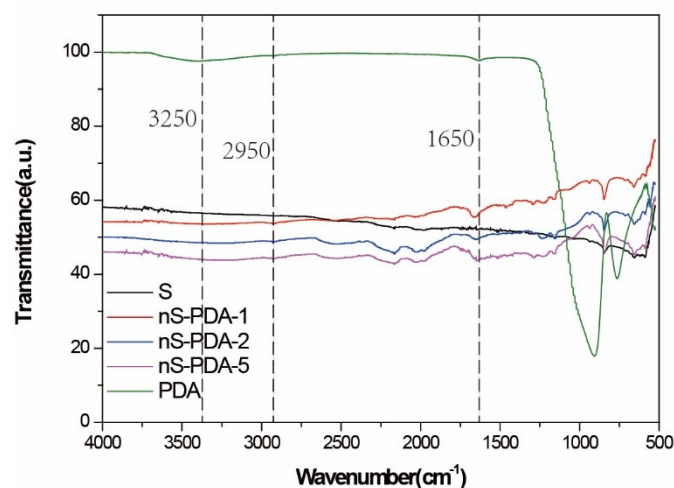

Figure S2. FTIR spectra of the pDA coated sulfur nanoparticles, sulfur and pDA film.

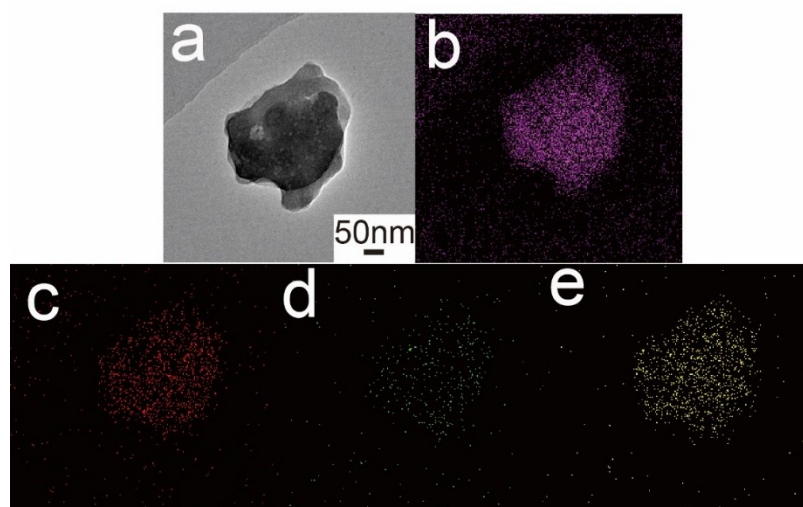

Figure S3. STEM image of nS-pDA-1 (a), and element mapping of for carbon (b), nitrogen (c), oxygen (d) and sulfur (e).

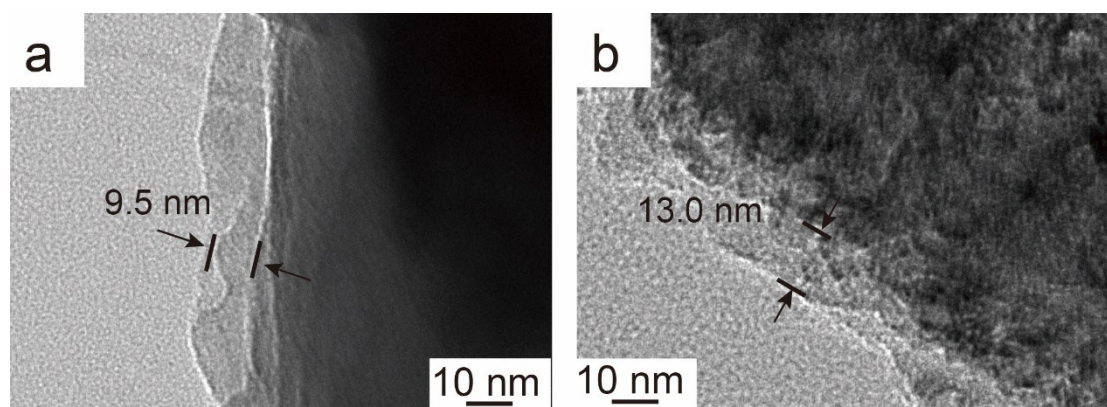

Figure S4. TEM images of ns@pDA-2 and ns@pDA-5.

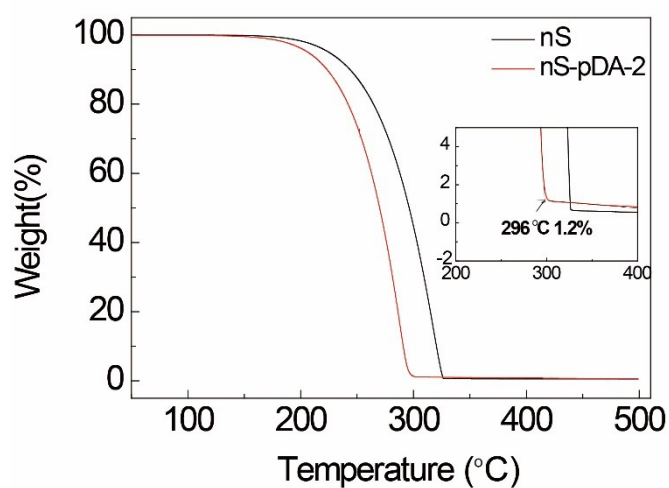

Figure S5. Thermogravimetric analysis of bare sulfur nanoparticles (nS) and ones coated with polydopamine (nS-pDA-2).

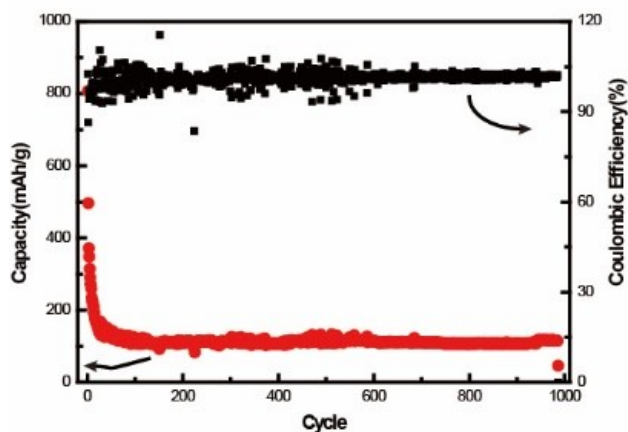

Figure S6. Cycling performance of bared sulfur nanoparticles.

Table S1. Summary of R1, R2 and R3 used in the fitting of Nyquist plots of the electrodes after cycling.

|    | ns@pDA-1 | ns@pDA-2 | ns@pDA-5 |
|----|----------|----------|----------|
| R1 | 3.11     | 4.43     | 9.95     |
| R2 | 40.02    | 28.37    | 46.4     |
| R3 | 23.74    | 29.16    | 96.2     |

In the equivalent circuits, R1 represents the resistance of the electrolyte. R3 is the interphase resistance. R2 is the charge transfer resistance, and CPE1, CPE2 are two constant phase elements.  $Z_w$  is the Warburg impedance.
